# Supplementary material for: A Multilevel Bayesian Markov Chain Monte Carlo Poisson Modelling of Factors Associated With Number of Components of Antenatal Care Offered Pregnant Women In Nigeria
Source: Research Square preprint supplement (doi:10.21203/rs.3.rs-578328/v1), 2021-06-11
Supplement: Supplementary file 1 [file fa3c35b5fb63d7b01ed70a31.docx]

**A multilevel Bayesian Markov Chain** **Monte Carlo Poisson modelling of factors associated with number of components of antenatal care offered pregnant women in Nigeria**

*Adeniyi Francis Fagbamigbea,b, Omon Stellamaris Fagbamigbec, Olugbenga Sunday Olaseinded, Oluwasomidoyin O. Belloe, Vincent Setlharef,Jackline Mosinya Nyaberig

a Department of Epidemiology and Medical Statistics, College of Medicine, University of Ibadan, Ibadan, Nigeria

b Health Data Science Unit, Division of Population and Behavioural Science, School of Medicine, University of St Andrews, St Andrews, United Kingdom

c Portsmouth Business School, Faculty of Business and Law, University of Portsmouth, United Kingdom

d Department of Sociology, Adekunle Ajasin University, Akungba Akoko, Nigeria

eDepartment of Obstetrics and Gynaecology, College of Medicine, University of Ibadan, Ibadan, Nigeria f fDepartment of Family Medicine and Public Health, Faculty of Medicine, University of Botswana, Gaborone, Botswana.Received:

gDepartment of Environmental Health and Disease Control, Jomo Kenyatta University of Agriculture and Technology, Nairobi, Kenya.

*Correspondence: [franstel74@yahoo.com; fadeniyi@cartafrica.org](mailto:franstel74@yahoo.com;%20fadeniyi@cartafrica.org); +2348061348165; ORCID: 0000-0001-9184-8258

Adeniyi Francis Fagbamigbe: [franstel74@yahoo.com; fadeniyi@cartafrica.org](mailto:franstel74@yahoo.com;%20fadeniyi@cartafrica.org)

Omon Stellamaris Fagbamigbe: omonstellamaris@yahoo.com

Olugbenga Olaseinde: [gbengaseinde@gmail.com](mailto:gbengaseinde@gmail.com)

Oluwasomidoyin O. Bello: bellodoyin@yahoo.com

Vincent Setlhare : [setlharev@ub.ac.bw](mailto:setlharev@ub.ac.bw)

Jackline Mosinya Nyaberi: jnyaberij@gmail.com

Supplementary Table A: Distribution of having all ANC component received during the most recent pregnancyby States and regions in Nigeria

| **Region** | **State** | **Had ≥1 ANC Contacts (%)** | **n** | **All 9** |
| --- | --- | --- | --- | --- |
| North Central |  | **72.2** | **1,420** | **4.5** |
|  | Plateau | 75.9 | 203 | 2.6 |
|  | Kogi | 82.2 | 147 | 0.4 |
|  | Niger | 59.2 | 271 | 0.8 |
|  | Nasarawa | 77.6 | 185 | 4.8 |
|  | Benue | 74.6 | 356 | 8.3 |
|  | FCT, Abuja | 87.7 | 91 | 3.4 |
|  | Kwara | 74.6 | 167 | 8.6 |
| North East |  | **71.5** | **2,142** | **3.1** |
|  | Borno | 62.4 | 350 | 0.1 |
|  | Taraba | 79.6 | 280 | 1.3 |
|  | Yobe | 69.8 | 417 | 2.1 |
|  | Bauchi | 66.9 | 493 | 2.4 |
|  | Gombe | 74.5 | 251 | 3.5 |
|  | Adamawa | 84.5 | 351 | 9.3 |
| North West |  | **63.7** | **3,772** | **1.5** |
|  | Kebbi | 52.1 | 281 | 0.3 |
|  | Kano | 83.6 | 1,106 | 0.6 |
|  | Katsina | 53.0 | 635 | 3.2 |
|  | Kaduna | 70.0 | 787 | 1.4 |
|  | Zamfara | 36.3 | 187 | 0.0 |
|  | Sokoto | 46.9 | 176 | 2.7 |
|  | Jigawa | 79.5 | 600 | 2.1 |
| South East |  | **96.2** | **1,479** | **8.3** |
|  | Ebonyi | 94.4 | 349 | 6.4 |
|  | Enugu | 96.2 | 222 | 2.4 |
|  | Imo | 97.5 | 277 | 6.7 |
|  | Anambra | 96.6 | 456 | 4.5 |
|  | Abia | 96.2 | 175 | 31.7 |
| South South |  | **81.1** | **1,111** | **5.8** |
|  | Cross River | 84.0 | 132 | 6.5 |
|  | Edo | 90.0 | 165 | 0.7 |
|  | Bayelsa | 42.3 | 47 | 6.1 |
|  | Rivers | 87.6 | 360 | 4.6 |
|  | Akwa Ibom | 80.7 | 206 | 11.4 |
|  | Delta | 76.7 | 201 | 5.7 |
| South West |  | **94.1** | **1,945** | **12.2** |
|  | Osun | 98.8 | 236 | 3.6 |
|  | Lagos | 95.4 | 691 | 10.4 |
|  | Ekiti | 93.1 | 145 | 5.4 |
|  | Oyo | 87.9 | 402 | 19.6 |
|  | Ondo | 95.4 | 186 | 1.5 |
|  | Ogun | 96.2 | 285 | 23.5 |
| **Total** |  | **75.2** | **11,867** | **5.1** |
